# Supplementary material
Source: Elsevier journal article supplement (https://www.sciencedirect.com/science/article/pii/S253005392030095X)
Supplement: mmc1 [file S253005392030095X:mmc1.doc]

Apêndice - Versão em português do Facial Disability Index

ÍNDICE DE DISFUNÇÃO FACIAL

Por favor, escolha a resposta mais apropriada para as seguintes questões relacionadas a problemas associados com a função de seus músculos faciais.

**Para cada pergunta, considere sua função facial durante o último mês:**

**Função Física**

1. Quanta dificuldade você teve para manter a comida na boca, mover a comida dentro da boca ou por ficar com a comida parada na bochecha enquanto comia?

Geralmente comi com:

5 = Nenhuma dificuldade

4 = Um pouco de dificuldade

3 = Alguma dificuldade

2 = Muita dificuldade

1 = Geralmente não comi por motivo de saúde

0 = Geralmente não comi por outras razões

2. Quanta dificuldade você teve para beber com copo?

Geralmente bebi com:

5 = Nenhuma dificuldade

4 = Um pouco de dificuldade

3 = Alguma dificuldade

2 = Muita dificuldade

1 = Geralmente não bebi por motivos de saúde

0 = Geralmente não bebi por outras razões

3 – Quanta dificuldade você teve para falar?

Geralmente falei com:

5 = Nenhuma dificuldade

4 = Um pouco de dificuldade

3 = Alguma dificuldade

2 = Muita dificuldade

1 = Geralmente não falei por motivo de doença

0 = Geralmente não falei por outras razões

4. Quanta dificuldade você teve por ficar com seu olho lacrimejando excessivamente ou por ficar com o olho ressecado?

Geralmente tive:

5 = Nenhuma dificuldade

4 = Um pouco de dificuldade

3 = Alguma dificuldade

2 = Muita dificuldade

1 = Geralmente não observei por motivo de saúde

0 = Geralmente não observei por outros motivos

5. Quanta dificuldade você teve para escovar os dentes ou enxaguar a boca?

Geralmente tive:

5= Nenhuma dificuldade

4 = Um pouco de dificuldade

3 = Alguma dificuldade

2 = Muita dificuldade

1 = Geralmente não escovei os dentes ou enxaguei a boca por motivo de saúde

0 = Geralmente não escovei os dentes ou enxaguei a boca por outras razões

**Função Bem-estar Social**

6. Com que frequência você se sentiu calmo e tranquilo?

6 = O tempo todo

5= A maior parte do tempo

4= Uma boa parte do tempo

3= Algumas vezes

2= Poucas vezes

1= Nenhuma vez

7. Com que frequência você se isolou das pessoas ao seu redor?

1= O tempo todo

2= A maior parte do tempo

3= Uma boa parte do tempo

4 = Algumas vezes

5 = Poucas vezes

6 = Nenhuma vez

8. Com que frequência você ficou irritado com as pessoas ao seu redor?

1= O tempo todo

2= A maior parte do tempo

3= Uma boa parte do tempo

4 = Algumas vezes

5 = Poucas vezes

6 = Nenhuma vez

9. Com que frequência você perdeu o sono ou acordou várias vezes durante a noite?

1= Todas as noites

2= A maioria das noites

3= Várias noites

4= Algumas noites

5= Poucas noites

6= Nenhuma noite

10. Com que frequência sua função facial lhe impediu de sair para comer, fazer compras ou participar de atividades familiares ou sociais?

1= O tempo todo

2= A maior parte do tempo

3= Uma boa parte do tempo

4= Algumas vezes

5= Poucas vezes

6= Nenhuma vez

| **Escore Função Física**  Pontuação (questões 1-5) – N x 25 =______  N | **Escore Função Social/ Bem-Estar**  Pontuação (questões 6-10) – N x 20 = ______  N |
| --- | --- |
| Escore FDI total = escore função física + escore função social/bem-estar = ________  200 | |
